# Supplementary material
Source: Royal Society of Chemistry journal article supplement (doi:10.1039/d6tc00636a)
Supplement: d6tc00636a1.pdf [file d6tc00636a1.pdf]

## Supporting Information

### **B-O Covalent Bonds Annulated Hot Exciton Molecular Design for High-Performance Narrowband UV-OLEDs**

Jie Li,<sup>a</sup> Zhang-Li Cheng,<sup>b</sup> Yue Wang,<sup>a</sup> Shu-Qi Zhang,<sup>b</sup> Hui Wang,<sup>b</sup> Ling-Wei Qu,<sup>a</sup> Mai Ke Lin,<sup>a</sup> Xi Zhang,<sup>a</sup> Jia Yu,<sup>b</sup> Bin Chen,<sup>\*a</sup> Kai Wang,<sup>\*b,c</sup> Jun Ye<sup>\*a</sup>

<sup>a</sup> School of Materials Science and Chemical Engineering, Ningbo University, Ningbo, Zhejiang, 315211, P. R. China

<sup>b</sup> Institute of Functional Nano & Soft Materials (FUNSOM), Soochow University, Suzhou, Jiangsu, 215123, P. R. China

<sup>c</sup> State Key Laboratory of Bioinspired Interfacial Materials Science, Soochow University, Suzhou, Jiangsu, 215123, P. R. China

\*Corresponding authors: chenbin2@nbu.edu.cn; wkai@suda.edu.cn; yejun@nbu.edu.

cn.

## General information

**Synthesis.** The chemicals and reagents purchased from commercial sources were used without further purification unless otherwise stated. The main synthesis was performed using standard Schlenk techniques under a nitrogen atmosphere, and the target molecules were further purified by sublimation.  $^1\text{H}$  NMR spectra were measured on a Bruker 400 MHz spectrometer with tetramethylsilane (TMS) as the internal standard. Mass analyses were recorded by an Autoflex MALDI-TOF mass spectrometer. Elemental analysis was performed using a Vario Micro cube.

**Theoretical calculation.** The front molecular orbitals (FMOs) of the optimized ground state and excited state were calculated with time-dependent density functional theory (TD-DFT) employing the B3LYP/6-31g(d) basis set in the Gaussian 16 program package. Natural transition orbital (NTO) analysis and determination of the contributions of atoms to FMOs were carried out using a multifunctional wavefunction analyzer (Multiwfn 3.6).

**Electrochemical measurements.** Cyclic voltammetry (CV) was performed on a CHI660e electrochemistry station. The samples were all prepared in *N,N*-dimethylformamide solution and degassed with nitrogen gas for 10 minutes before the test. The supporting electrolyte was 0.1 M tetrabutylammonium hexafluorophosphate ( $[\text{nBu}_4\text{N}]\text{PF}_6$ ), while the gold, platinum and 3.0 M Ag/AgNO<sub>3</sub> electrodes served as the working, counter and reference electrodes, respectively. Cyclic voltammograms were obtained at a scan rate of 0.02 V·s<sup>-1</sup> with standardization against ferrocene/ferrocenium.

**Photophysical measurements.** UV–vis absorption and photoluminescence (PL) spectra were recorded by using a Hitachi ultraviolet–visible (UV–vis) spectrophotometer U-3010 and a Hitachi fluorescence spectrometer F-4600, respectively. The PL quantum efficiency (PLQY) was measured via an absolute PL quantum yield measurement system (C11347-01, Hamamatsu Photonics) under a flow of nitrogen gas with an excitation wavelength of 300 nm. Transient decay measurements were carried out with an Edinburgh fluorescence spectrometer (FLS920).

**Analysis of rate constants.** The key kinetic parameters of the two emitters are estimated according to the following equations<sup>[1-2]</sup>:

$$\begin{aligned} \varphi_{total} &= \varphi_p + \varphi_d & \varphi_T &= 1 - \varphi_p \\ k_p &= \frac{1}{\tau_p} & k_d &= \frac{1}{\tau_d} \\ k_r^S &= k_p \varphi_p & k_{ISC} &= k_p (1 - \varphi_p) \\ k_{RISC} &= \frac{k_p k_d \varphi_d}{k_{ISC} \varphi_p} & k_{nr}^T &= k_d \left( 1 - \frac{k_{ISC}}{k_p} \right) k_{RISC} \end{aligned}$$

where  $\varphi_p$  and  $\varphi_d$  are the prompt and delayed fluorescence quantum efficiencies, respectively;  $\varphi_T$  is the ISC efficiency; and  $k_p$ ,  $k_{RISC}$ , and  $k_d$  are the rate constants of prompt fluorescence, the RISC, and delayed fluorescence decay, respectively.  $k_r^S$  and  $k_{nr}^T$  are the rate constants of the singlet radiative transition and triplet nonradiative transition, respectively.

**Device fabrication and measurement of EL characteristics.** OLEDs were fabricated on indium tin oxide (ITO)-coated transparent glass substrates with multiple layers. The ITO glass substrates had a thickness of ca. 100 nm and a sheet resistance of ca. 30  $\Omega$  per square and were cleaned with an optical detergent, deionized water, acetone, and isopropanol successively and then dried in an oven. For vacuum-evaporation OLEDs, the ITO substrates were first exposed to UV ozone for 15 minutes. All the organic materials were thermally evaporated at a rate of 1  $\text{\AA}$   $\text{s}^{-1}$  under a vacuum of ca.  $10^{-5}$  Torr. Finally, LiF and Al were successively deposited at rates of 0.1  $\text{\AA}$   $\text{s}^{-1}$  and 5  $\text{\AA}$   $\text{s}^{-1}$ , respectively. Four identical OLED devices were formed on each of the substrates, and the emission area was 0.09  $\text{cm}^2$  for each device. For solution-processed OLEDs, the ITO substrates were first exposed to UV ozone for 15 minutes. The EL performances of the devices were measured with a PHOTO RESEARCH Spectra Scan PR 655 PHOTOMETER and a KEITHLEY 2400 Source Meter constant current source at room temperature.

## Experimental

### Synthesis

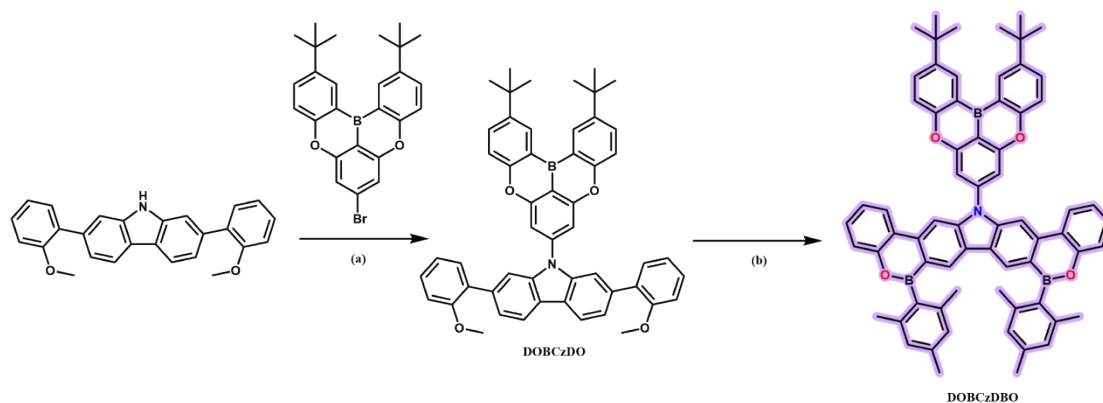

**Scheme S1** Synthetic routes of **DOBCzDO** and **DOBCzDBO**. Reaction conditions: (a) Pd(OAc)<sub>2</sub>, [(*t*Bu)<sub>3</sub>P]HBF<sub>4</sub>, *t*-BuONa, toluene, 110 °C; (b) Mesitylene, RT; BBr<sub>3</sub>, -20 °C; DIEA, 150 °C; MesMgBr, RT.

### Synthesis of DOBCzDO :

A mixture of 7-bromo-2,12-di-tert-butyl-5,9-dioxa-13b-boranaphtho [3,2,1-de]anthracene (4.61 g, 10 mmol), 3,6-Bis(2-methoxyphenyl)-9H-carbazole (3.79 g, 11 mmol), Pd<sub>2</sub>(dba)<sub>3</sub> (0.45 g, 0.5 mmol), [(*t*Bu)<sub>3</sub>P]HBF<sub>4</sub> (0.29 g, 1 mmol), *t*-BuONa (1.92 g, 20 mmol) and 50 ml toluene were added in a 100 mL two-necked round-bottom flask refluxed at 110 °C under N<sub>2</sub> protection for 12 hours. After cooling to room temperature, the mixture was extracted with water (3 × 50 mL) and dichloromethane (DCM, 3 × 50 mL) for three times. The organic layer was dried over anhydrous magnesium sulfate (MgSO<sub>4</sub>), filtered, and then the solvent was evaporated. The residue was purified via column chromatography eluting with petroleum ether: dichloromethane (5:1, V/V) to obtain a green solid (5.67 g, yield: 71%). <sup>1</sup>H NMR (400 MHz, Chloroform-*d*). δ 8.80 (d, *J* = 2.4 Hz, 2H), 8.21 (d, *J* = 8.1 Hz, 2H), 7.96 – 7.91 (m, 2H), 7.81 (dd, *J* = 8.8, 2.4 Hz, 2H), 7.58 – 7.50 (m, 6H), 7.47 (dd, *J* = 7.5, 1.6 Hz, 2H), 7.37 – 7.32 (m, 2H), 7.09 – 7.01 (m, 4H), 3.89 (s, 6H), 1.53 (s, 18H). C<sub>52</sub>H<sub>46</sub>BNO<sub>4</sub>(C, 83.39; H, 6.19; N, 1.87). HR-MS (*m/z*): calcd for C<sub>52</sub>H<sub>46</sub>BNO<sub>4</sub> 759.1855; Found 759.1868.

### Synthesis of DOBCzDBO:

Under a nitrogen atmosphere,  $\text{BBr}_3$  (1.2 mL, 10 mmol) was added dropwise in a solution of **DOBCzDO** (1.51 g, 2 mmol) in *o*-dichlorobenzene (30 mL) at room temperature. The reaction mixture was stirred at room temperature for 3.0 h. Then, *N,N*-diisopropylethylamine (DIEA) (0.53 mL, 3.0 mmol) was added at 0 °C, and the reaction mixture was allowed to warm to 150 °C for 12 h. After cooling to room temperature,  $\text{MesMgBr}$  (18 mL, 15 mmol) was added, and the reaction mixture was allowed to warm to 50 °C for 2 h. The mixture was extracted with water ( $3 \times 50$  mL) and dichloromethane (DCM,  $3 \times 50$  mL) for three times. The organic layer was dried over anhydrous magnesium sulfate ( $\text{MgSO}_4$ ), filtered, and then the solvent was evaporated. The residue was purified by column chromatography eluting with petroleum ether: dichloromethane (2:1, V/V) to afford **DOBCzDBO** (1.24 g, yield: 84%).  $^1\text{H}$  NMR (400 MHz, Chloroform-*d*)  $\delta$  8.91 (d,  $J = 2.5$  Hz, 2H), 8.72 (s, 2H), 8.45 (s, 2H), 8.29 (dd,  $J = 8.3, 1.6$  Hz, 2H), 7.91 (dd,  $J = 8.8, 2.4$  Hz, 2H), 7.65 (s, 1H), 7.63 (d,  $J = 2.0$  Hz, 3H), 7.57 (dd,  $J = 8.1, 1.3$  Hz, 2H), 7.47 (ddd,  $J = 8.2, 7.1, 1.5$  Hz, 2H), 7.34 – 7.29 (m, 2H), 7.04 (s, 4H), 2.45 (s, 6H), 2.29 (s, 12H), 1.59 (s, 18H).  $\text{C}_{68}\text{H}_{60}\text{B}_3\text{NO}_4$  (C, 85.50 H, 6.33; N, 1.47) HR-MS ( $m/z$ ): calcd for  $\text{C}_{68}\text{H}_{60}\text{B}_3\text{NO}_4$  989.4933; Found 987.4940

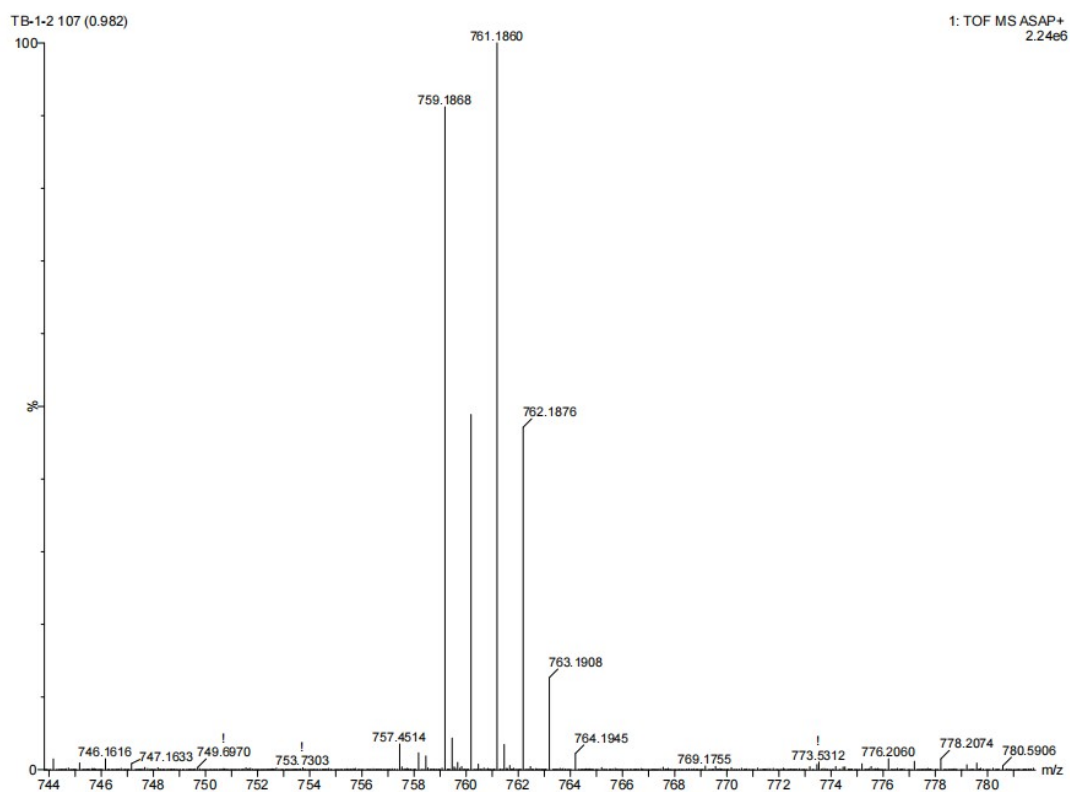

**Figure S1.** High-resolution mass spectrum (HRMS) of DOBCzDO.

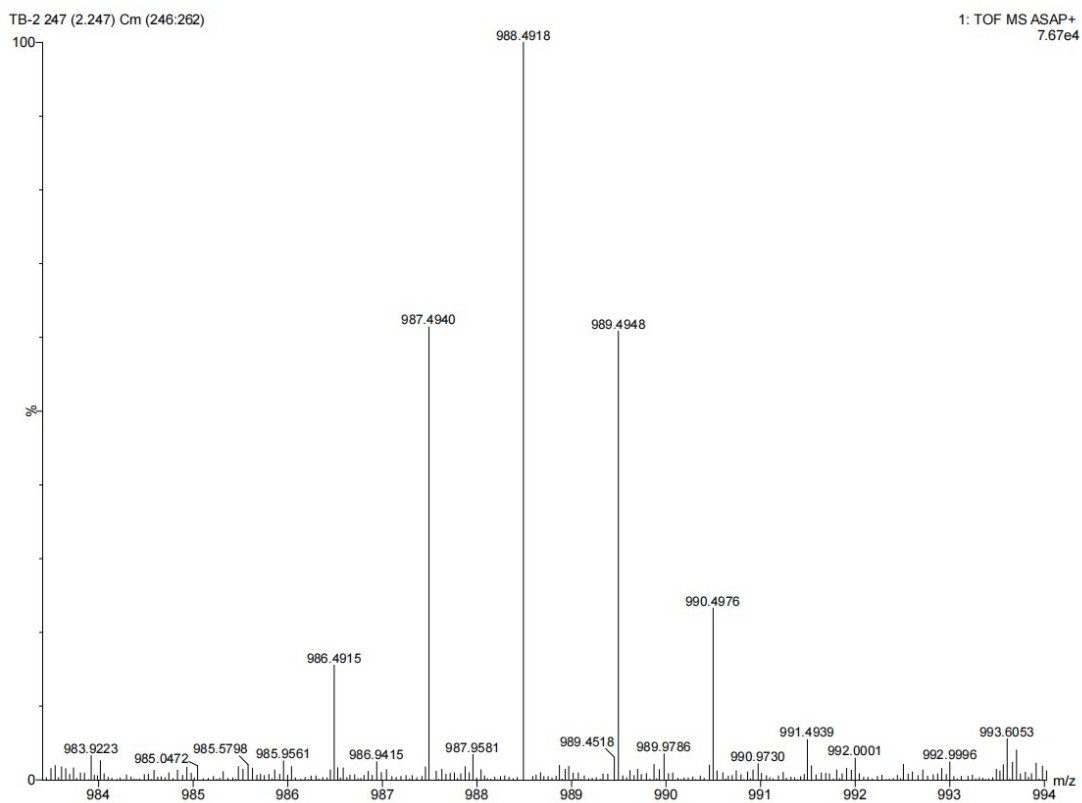

**Figure S2.** High-resolution mass spectrum (HRMS) of DOBCzDBO.

## Thermostability

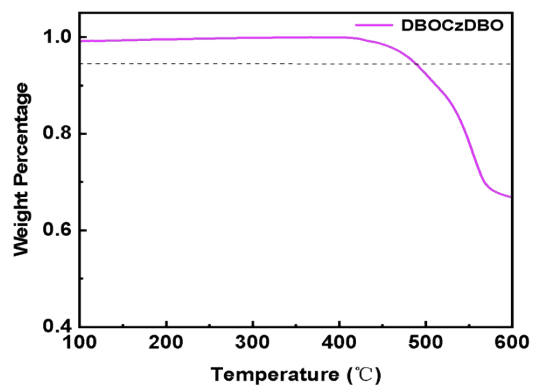

Figure S3. TGA curve of DOBCzDBO.

## Electrochemical properties

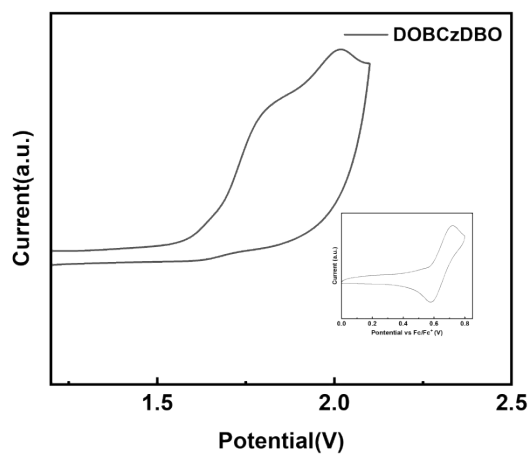

Figure S4. Cyclic voltammogram curve of DOBCzDBO.

### Theoretical calculations

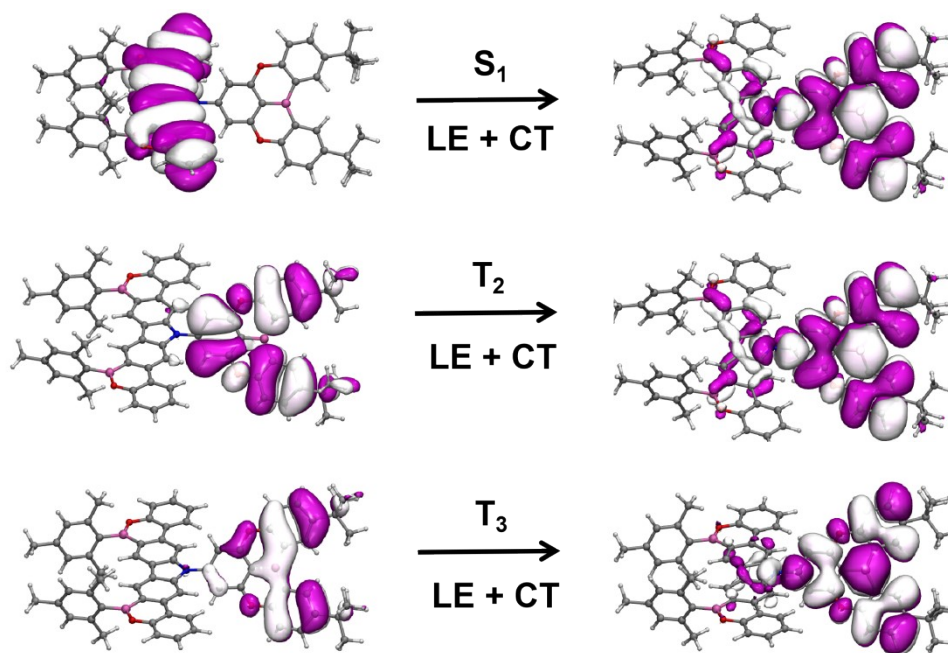

**Figure S5.** The natural transition orbitals (NTOs) analysis of **DBOCzDBO**.

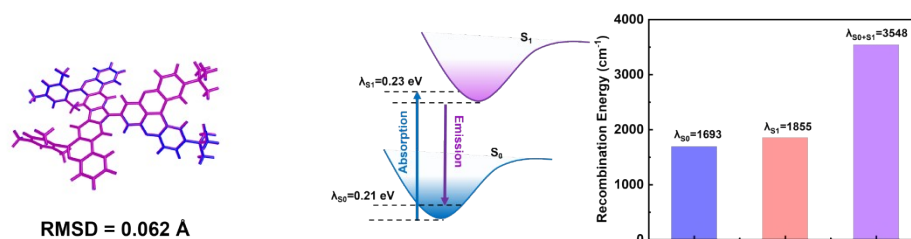

**Figure S6.** Reorganization energies with optimized S<sub>0</sub> and S<sub>1</sub> geometries and single point energies of **DBOCzDBO**, and geometry comparison between optimized S<sub>0</sub> (blue) and S<sub>1</sub> (purple) states of **DBOCzDBO**.

## Photophysical properties

**Table S1.** Kinetic parameters of **DOBCzDBO**.

| Emitters        | $\lambda_{\text{abs}}^{\text{a}}$<br>[nm] | $\lambda_{\text{PL}}^{\text{b}}$<br>[nm] | $\Phi_{\text{PLQY}}^{\text{c}}$<br>[%] | $\tau_{\text{PL}}^{\text{d}}$<br>[ns] | HOMO <sup>e</sup><br>[eV] | LUMO <sup>f</sup><br>[eV] | $E_{\text{opt}}^{\text{g}}$<br>[eV] | $T_{\text{d}}^{\text{h}}$<br>[°C] |
|-----------------|-------------------------------------------|------------------------------------------|----------------------------------------|---------------------------------------|---------------------------|---------------------------|-------------------------------------|-----------------------------------|
| <b>DOBCzDBO</b> | 362                                       | 391                                      | 70.4                                   | 6.01                                  | -6.05                     | -2.56                     | 3.4                                 | 489                               |

**a** Maximum absorption wavelength in dilute toluene solutions ( $10^{-5}$  mol L<sup>-1</sup>).

**b** Measured in dilute toluene solutions.

**c** Measured in 2 wt% **DOBCzDBO** doped mCP film.

**d** Fluorescence lifetimes in tetrahydrofuran.

**e** Measured by cyclic voltammetry measurement.

**f** LUMO = HOMO +  $E_{\text{opt}}$

**g** Optical energy gap obtained from the onset of UV-vis absorption spectrum in toluene.

**h** Decomposition temperature (5% weight loss).

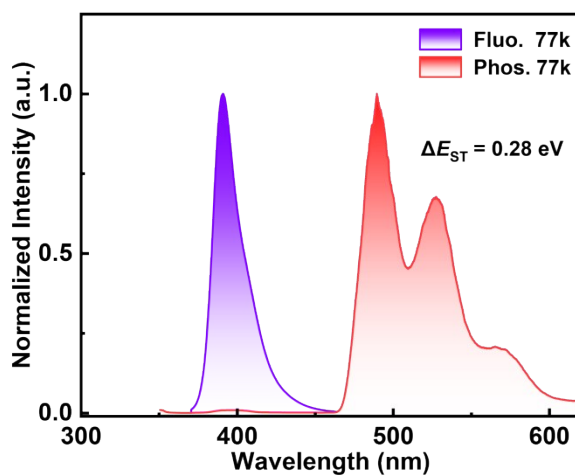

**Figure S7.** Normalized fluorescence and phosphorescence spectra of 2 wt% **DOBCzDBO** based mCP thin films at 77K.

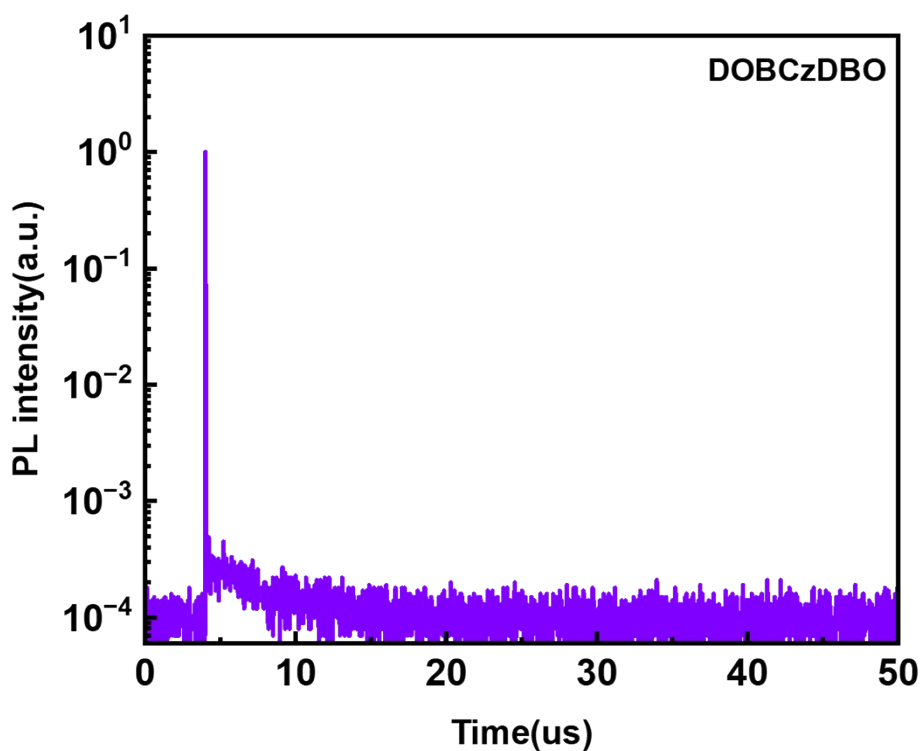

**Figure S8.** The transient PL decay curves of **DOBCzBO** in toluene solution ( $10^{-5}$  M).

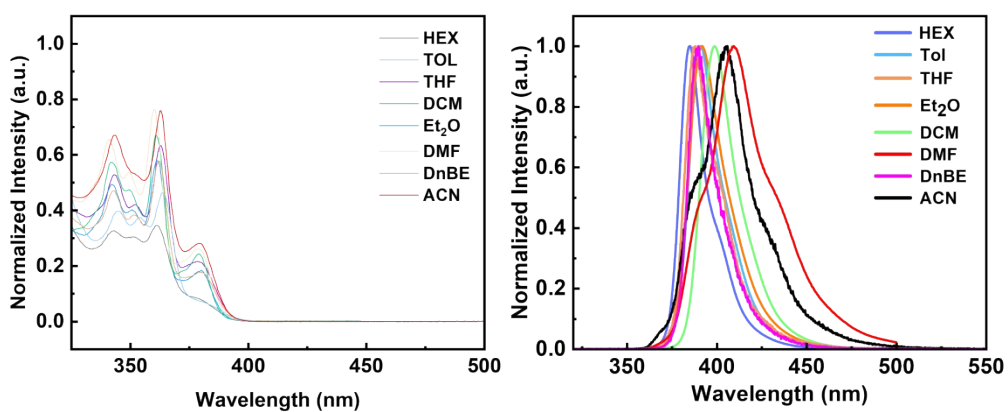

**Figure S9.** a) UV–Vis absorption of **DOBCzDBO**, and b) emission spectra **DOBCzDBO** in various solvents at room temperature.



| Compound            | $\lambda_{EL}^{[a]}$<br>[nm] | FWHM <sup>[b]</sup><br>[nm] | EQE <sub>max</sub> <sup>[c]</sup><br>[%] | CIE (x, y) <sup>[d]</sup> | Ref.             |
|---------------------|------------------------------|-----------------------------|------------------------------------------|---------------------------|------------------|
| <b>DOBCzDBO</b>     | <b>392</b>                   | <b>28</b>                   | <b>8.9</b>                               | <b>(0.162, 0.020)</b>     | <b>This work</b> |
| <b>ICz-BO</b>       | <b>414</b>                   | <b>37</b>                   | <b>12.01</b>                             | <b>(0.164, 0.031)</b>     | [1]              |
| <b>9-PCZCFTZ</b>    | <b>390</b>                   | <b>-</b>                    | <b>14.5</b>                              | <b>(0.162, 0.045)</b>     | [2]              |
| <b>CDFDB</b>        | <b>398</b>                   | <b>55</b>                   | <b>12.0</b>                              | <b>(0.16, 0.04)</b>       | [3]              |
| <b>4DBF-CZCN</b>    | <b>390</b>                   | <b>42</b>                   | <b>3.00</b>                              | <b>(0.164, 0.034)</b>     | [4]              |
| <b>2DBF-CZCN</b>    | <b>388</b>                   | <b>38</b>                   | <b>2.86</b>                              | <b>(0.164, 0.036)</b>     |                  |
| <b>3,6-CNCzC3</b>   | <b>407</b>                   | <b>44</b>                   | <b>6.69</b>                              | <b>(0.161, 0.028)</b>     | [5]              |
| <b>3,6-mPPICNC3</b> | <b>391</b>                   | <b>41</b>                   | <b>7.85</b>                              | <b>(0.161, 0.025)</b>     |                  |
| <b>3,6-pPPICNC3</b> | <b>406</b>                   | <b>41</b>                   | <b>7.51</b>                              | <b>(0.160, 0.035)</b>     | [6]              |
| <b>2,7-mPPICNC3</b> | <b>425</b>                   | <b>51</b>                   | <b>5.42</b>                              | <b>(0.161, 0.033)</b>     |                  |
| <b>BO-bph</b>       | <b>394</b>                   | <b>48</b>                   | <b>11.3</b>                              | <b>(0.166, 0.021)</b>     | [7]              |
| <b>BO-Nap</b>       | <b>404,421</b>               | <b>45</b>                   | <b>11.9</b>                              | <b>(0.161, 0.022)</b>     |                  |
| <b>mCzPI</b>        | <b>376,395</b>               | <b>38</b>                   | <b>3.78</b>                              | <b>(0.165, 0.028)</b>     | [8]              |
| <b>mMCzPI</b>       | <b>376,393</b>               | <b>38</b>                   | <b>3.03</b>                              | <b>(0.166, 0.027)</b>     |                  |
| <b>FIP-CZ</b>       | <b>427</b>                   | <b>49</b>                   | <b>10.40</b>                             | <b>(0.158, 0.039)</b>     | [9]              |
| <b>VDMP-36PhCz</b>  | <b>404</b>                   | <b>50</b>                   | <b>7.55</b>                              | <b>(0.159, 0.039)</b>     | [10]             |
| <b>tBOSi</b>        | <b>414</b>                   | <b>32</b>                   | <b>9.15</b>                              | <b>(0.165, 0.034)</b>     | [11]             |
| <b>tBOSiCz</b>      | <b>414</b>                   | <b>32</b>                   | <b>8.91</b>                              | <b>(0.163, 0.031)</b>     |                  |
| <b>DCZ2F</b>        | <b>404</b>                   | <b>50</b>                   | <b>5.62</b>                              | <b>(0.163, 0.035)</b>     | [12]             |
| <b>DTPCZNATZ</b>    | <b>427</b>                   | <b>-</b>                    | <b>4.4</b>                               | <b>(0.157, 0.035)</b>     |                  |
| <b>DTPCZPHTZ</b>    | <b>427</b>                   | <b>-</b>                    | <b>5.7</b>                               | <b>(0.157, 0.037)</b>     | [13]             |
| <b>2MCz-CNMCz</b>   | <b>404</b>                   | <b>-</b>                    | <b>7.76</b>                              | <b>(0.158, 0.039)</b>     |                  |
| <b>mP2MPC</b>       | <b>376, 395</b>              | <b>51</b>                   | <b>6.09</b>                              | <b>(0.163, 0.028)</b>     | [14]             |
| <b>POPCN-2CP</b>    | <b>388</b>                   | <b>40</b>                   | <b>5.3</b>                               | <b>(0.161, 0.025)</b>     | [15]             |
| <b>2BuCz-CNCz</b>   | <b>396</b>                   | <b>33</b>                   | <b>10.79</b>                             | <b>(0.161, 0.031)</b>     | [16]             |

|                   |            |           |             |                       |             |
|-------------------|------------|-----------|-------------|-----------------------|-------------|
| <b>OCI</b>        | <b>424</b> | <b>55</b> | <b>5.06</b> | <b>(0.158, 0.036)</b> | <b>[17]</b> |
| <b>2FPPI mTPA</b> | <b>416</b> | <b>-</b>  | <b>4.12</b> | <b>(0.160, 0.038)</b> | <b>[18]</b> |
| <b>DFPBI</b>      | <b>425</b> | <b>56</b> | <b>4.96</b> | <b>(0.157, 0.039)</b> | <b>[19]</b> |

<sup>[a]</sup> Peak wavelength of the EL spectrum; <sup>[b]</sup> Full width at half maximum; <sup>[c]</sup> Maximum EQE; <sup>[d]</sup> Commission Internationale de l'Éclairage (CIE) coordinates.

## NMR spectra

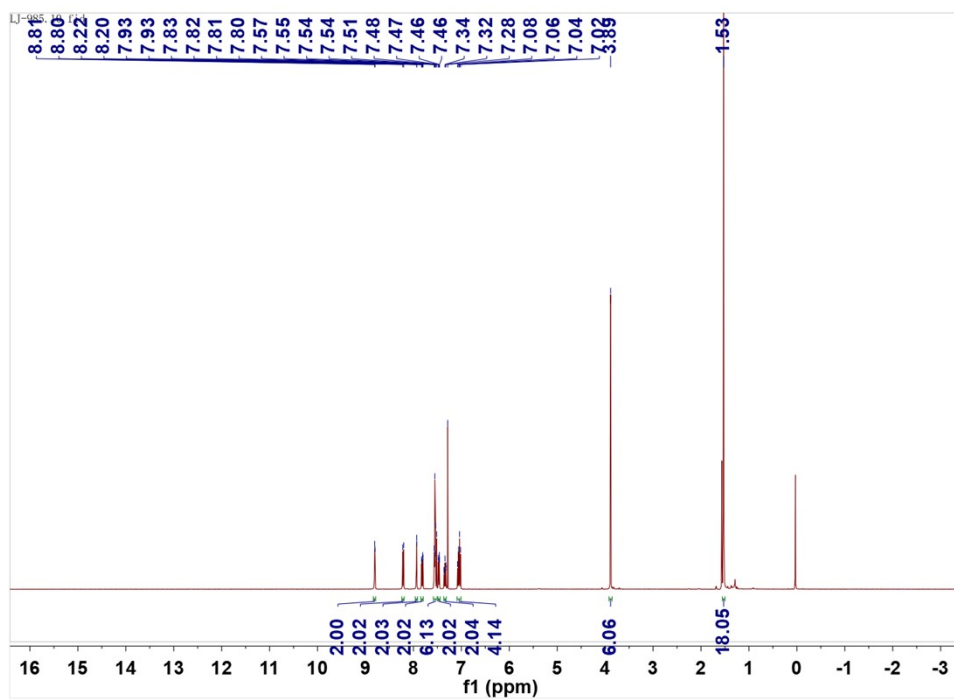

Figure S11. <sup>1</sup>H NMR spectrum (CDCl<sub>3</sub>, 400 MHz) of DOBCzDO.

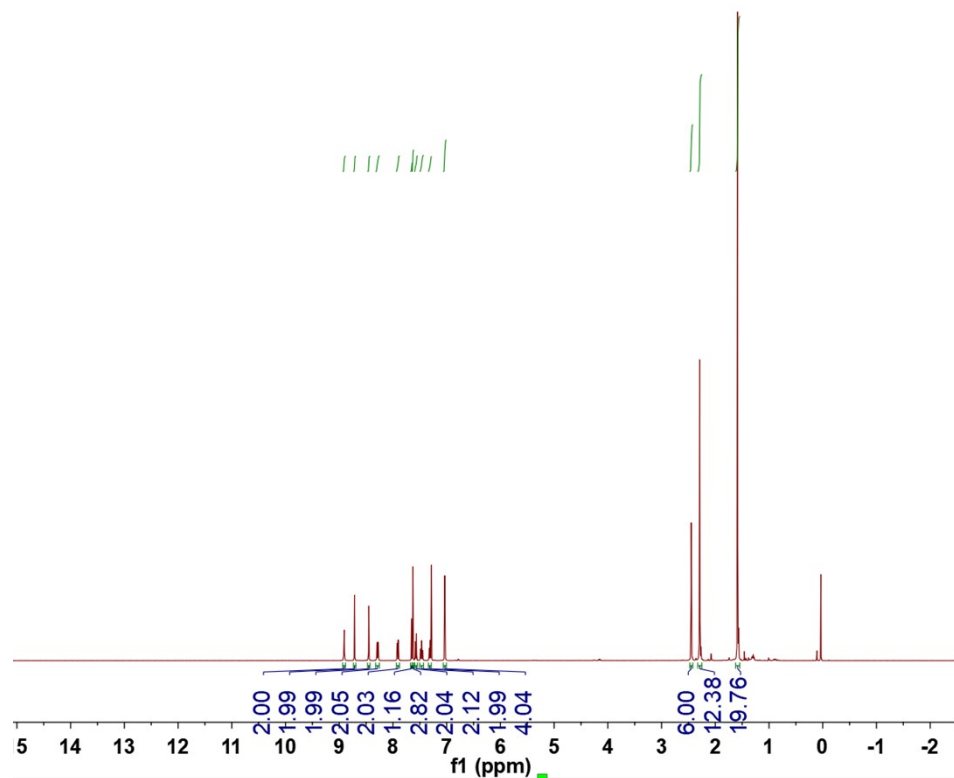

Figure S12. <sup>13</sup>C NMR spectrum (CDCl<sub>3</sub>, 400 MHz) of DOBCzDBO.

## Reference

- [1] H. Zhou, R. Wang, M. Sun, Y. Zhou, L. Zhang, J. Song, Q. Sun, S.-T. Zhang, W. Yang, S. Xue, *Chem. Sci.* **2024**, 15, 18601–18607.
- [2] K. Zhang, Z. Zhou, D. Liu, Y. Chen, S. Zhang, J. Pan, X. Qiao, D. Ma, S. Su, W. Zhu, Y. Liu, *Angew. Chem. Int. Ed.* **2024**, 63, e202407502.
- [3] H. Huang, R. Chen, S. He, S. Wang, H. Qi, L. Peng, Y. Liu, S. Ying, S. Yan, *Dyes Pigm.* **2024**, 231, 112420.
- [4] H. Qi, S. Wang, Z. Gao, D. Xie, J. Li, Y. Liu, S. Xue, S. Ying, D. Ma, S. Yan, *ACS Mater. Lett.* **2024**, 6, 3844–3853.
- [5] H. Qi, D. Xie, Z. Gao, S. Wang, L. Peng, Y. Liu, S. Ying, D. Ma, S. Yan, *Chem. Sci.* **2024**, 15, 11053–11064.
- [6] G. Li, K. Xu, J. Zheng, X. Fang, W. Lou, F. Zhan, C. Deng, Y.-F. Yang, Q. Zhang, Y. She, *J. Am. Chem. Soc.* **2024**, 146, 1667–1680.
- [7] Z. Zhong, Z. Liu, X. Wang, D. Xiong, H. Li, X. J. Feng, Z. Zhao, H. Lu, *J. Mater. Chem. C* **2023**, 11, 16271–16279.
- [8] C. Liao, B. Chen, Q. Xie, X. Li, H. Liu, S. Wang, *Adv. Mater.* **2023**, 35, 2305310.
- [9] T. Chen, J. Lou, H. Wu, J. Luo, D. Yang, X. Qiao, H. Zhang, B. Z. Tang, Z. Wang, *Adv. Opt. Mater.* **2023**, 11, 2301053.
- [10] X.-Q. Gan, Z.-M. Ding, D.-H. Liu, W.-Q. Zheng, B. Ma, H. Zhang, X. Chang, L. Wang, Y. Liu, X. Wu, S.-J. Su, W. Zhu, *Adv. Opt. Mater.* **2023**, 11, 2300195.
- [11] Y. Huo, J. Lv, M. Wang, Z. Duan, H. Qi, S. Wang, Y. Liu, L. Peng, S. Ying, S. Yan, *J. Mater. Chem. C* **2023**, 11, 6347–6353.
- [12] M. Sun, T. Li, M. Xie, H. Zhou, Q. Sun, D. Liu, Y. Pan, S. Zhang, W. Yang, S. Xue, *Dyes Pigm.* **2023**, 210, 111002.
- [13] X. Guo, G. Li, J. Lou, K. Chen, R. Huang, D. Yang, H. Zhang, Z. Wang, B. Z. Tang, *Small* **2022**, 18, 2204029.
- [14] L. Peng, J. Lv, S. Xiao, Y. Huo, Y. Liu, D. Ma, S. Ying, S. Yan, *Chem. Eng. J.* **2022**, 450, 138339.
- [15] J. Chen, H. Liu, J. Guo, J. Wang, N. Qiu, S. Xiao, J. Chi, D. Yang, D. Ma, Z. Zhao, B. Z. Tang, *Angew. Chem. Int. Ed.* **2022**, 61, e202116810.
- [16] H. Zhang, G. Li, X. Guo, K. Zhang, B. Zhang, X. Guo, Y. Li, J. Fan, Z. Wang, D. Ma, B. Z. Tang, *Angew. Chem. Int. Ed.* **2021**, 60, 22241–22247.
- [17] H. Zhou, M. Yin, Z. Zhao, Y. Miao, X. Jin, J. Huang, Z. Gao, H. Wang, J. Su, H. Tian, *J. Mater. Chem. C* **2021**, 9, 5899–5907.
- [18] Z. Li, N. Xie, Y. Xu, C. Li, X. Mu, Y. Wang, *Org. Mater.* **2020**, 02, 011–019.
- [19] X. Qiu, S. Ying, C. Wang, M. Hanif, Y. Xu, Y. Li, R. Zhao, D. Hu, D. Ma, Y. Ma, *J. Mater. Chem. C* **2019**, 7, 592–600.
